# Supplementary material for: Multidimensional severity assessment in bronchiectasis: an analysis of seven European cohorts
Source: PubMed Central journal article supplement — Thorax. 2016 Aug 11;71(12):1110–8. doi: 10.1136/thoraxjnl-2016-208481 (PMC5136700; doi:10.1136/thoraxjnl-2016-208481), 2016-08-11
Supplement: thoraxjnl-2016-208481supp.pdf [file thoraxjnl-2016-208481supp.pdf]

Online supplementary data

**Study Title:**

**Multidimensional severity assessment in bronchiectasis - An analysis of 7 European cohorts.**

Material contained in this document:

- Outline of the Bronchiectasis Severity Index (BSI) and FACED scores
- Tables S1-4: Calibration of the BSI and FACED scores in high and low risk groups
- Table S5(a) and (b): Mortality meta-analysis data with and without the cohort of Ellis et al, ERJ 2016
- Figure S1: Quality of life in the Royal Brompton cohort of Ellis et al, ERJ 2016.

## Clinical risk scores

### 1. Bronchiectasis Severity Index

|                                      |                      |                                      |                      |
|--------------------------------------|----------------------|--------------------------------------|----------------------|
| <b><u>Age</u></b>                    | <b><u>Points</u></b> | <b><u>Exacerbation frequency</u></b> | <b><u>Points</u></b> |
| <50                                  | 0                    | 3 or more per year                   | 2                    |
| 50-69                                | 2                    | <3 per year                          | 0                    |
| 70-79                                | 4                    |                                      |                      |
| 80+                                  | 6                    |                                      |                      |
| <b><u>BMI</u></b>                    | <b><u>Points</u></b> | <b><u>MRC dyspnoea score</u></b>     | <b><u>Points</u></b> |
| <18.5                                | 2                    | 1-3                                  | 0                    |
| >18.5                                | 0                    | 4                                    | 2                    |
|                                      |                      | 5                                    | 3                    |
| <b><u>FEV<sub>1</sub>% pred.</u></b> | <b><u>Points</u></b> | <b><u>Colonisation status</u></b>    | <b><u>Points</u></b> |
| >80%                                 | 0                    | No                                   | 0                    |
| 50-80%                               | 1                    | Colonised                            |                      |
| 30-49%                               | 2                    | 1                                    |                      |
| <30%                                 | 3                    | <i>P. aeruginosa</i>                 | 3                    |
| <b><u>Hospital adm.</u></b>          | <b><u>Points</u></b> | <b><u>Radiology</u></b>              | <b><u>Points</u></b> |
| Yes                                  | 5                    | 3 or more lobes or<br>cystic changes | 1                    |
| No                                   | 0                    | <3 lobes involved                    | 0                    |

**Classification:**  
 Mild = 0-4 points  
 Moderate = 5-8 point  
 Severe  $\geq$  9 points

### FACED score

- F – FEV1% predicted (cut-off point 50%; maximum value [MV]: 2 points);
- A – Age (cut-off: 70 years; MV: 2 points)
- C – Chronic colonisation with *Pseudomonas aeruginosa* (dichotomic; MV: 1 point)
- E - radiological Extension (E, number of lobes affected; cut-off: 2 lobes; MV: 1 point)
- D - Dyspnoea (cut-off point: grade II on the MRC scale; MV: 1 point)

### Classification

Mild = 0-2 points

Moderate = 3-4 points

Severe = 5-7 points

Calibration analysis

BSI - low risk cohort

| Cohort            | Event rate | Control rate | Odds ratio                |
|-------------------|------------|--------------|---------------------------|
| Athens, Greece    | 0%         | 2.6%         | 0.46 [0.03, 8.58]         |
| Dundee, Scotland  | 0.7%       | 2.6%         | 0.28 [0.03, 2.39]         |
| Galway, Ireland   | 7.3%       | 2.6%         | 2.95 [0.94, 9.24]         |
| Leuven, Belgium   | 3.9%       | 2.6%         | 1.52 [0.29, 8.06]         |
| Monza, Italy      | 0%         | 2.6%         | 0.25 [0.01, 4.60]         |
| Newcastle, Eng    | 0%         | 2.6%         | 0.79 [0.04, 14.76]        |
| Vojvodina, Serbia | 0%         | 2.6%         | 0.41 [0.02, 7.53]         |
| Pooled            | $I^2=8\%$  |              | 1.09 (0.49-2.45), $p=0.8$ |

BSI – high risk cohort

| Cohort            | Event rate | Control rate | Odds ratio                |
|-------------------|------------|--------------|---------------------------|
| Athens, Greece    | 11.3%      | 23.3%        | 0.42 [0.19, 0.90]         |
| Dundee, Scotland  | 19.0%      | 23.3%        | 0.77 [0.46, 1.31]         |
| Galway, Ireland   | 31.6%      | 23.3%        | 0.76 [0.39, 1.46]         |
| Leuven, Belgium   | 34.2%      | 23.3%        | 1.71 [0.96, 3.05]         |
| Monza, Italy      | 13.9%      | 23.3%        | 0.53 [0.26, 1.09]         |
| Newcastle, Eng    | 18.8%      | 23.3%        | 1.52 [0.85, 2.72]         |
| Vojvodina, Serbia | 33.3%      | 23.3%        | 1.64 [0.66, 4.09]         |
| Pooled            | $I^2=62\%$ |              | 0.93 (0.62-1.39), $p=0.7$ |

FACED – low risk cohort

| Cohort            | Event rate | Control rate | Odds ratio               |
|-------------------|------------|--------------|--------------------------|
| Athens, Greece    | 0%         | 4.3%         | 0.10 [0.01, 1.76]        |
| Dundee, Scotland  | 4.0%       | 4.3%         | 0.92 [0.39, 2.18]        |
| Galway, Ireland   | 10.6%      | 4.3%         | 2.66 [1.23, 5.72]        |
| Leuven, Belgium   | 9.0%       | 4.3%         | 2.22 [0.87, 5.63]        |
| Monza, Italy      | 2.2%       | 4.3%         | 0.51 [0.14, 1.88]        |
| Newcastle, Eng    | 6.6%       | 4.3%         | 1.58 [0.56, 4.48]        |
| Vojvodina, Serbia | 6.7%       | 4.3%         | 1.60 [0.48, 5.29]        |
| Pooled            | $I^2=42\%$ |              | 1.36 [0.79, 2.33], p=0.3 |

FACED – high risk cohort

| Cohort            | Event rate | Control rate | Odds ratio                     |
|-------------------|------------|--------------|--------------------------------|
| Athens, Greece    | 25.0%      | 62.1%        | 0.20 [0.07, 0.59]              |
| Dundee, Scotland  | 32.6%      | 62.1%        | 0.30 [0.15, 0.60]              |
| Galway, Ireland   | 20.0%      | 62.1%        | 0.15 [0.03, 0.75]              |
| Leuven, Belgium   | 64.0%      | 62.1%        | 1.08 [0.45, 2.64]              |
| Monza, Italy      | 25.9%      | 62.1%        | 0.21 [0.08, 0.54]              |
| Newcastle, Eng    | 37.5%      | 62.1%        | 0.37 [0.08, 1.60]              |
| Vojvodina, Serbia | 33.3%      | 62.1%        | 0.30 [0.07, 1.27]              |
| Pooled            | $I^2=37\%$ |              | 0.33 [0.23, 0.48],<br>p<0.0001 |

With the inclusion of Ellis et al into the pooled cohort for FACED high risk score:

| Cohort                   | Event rate | Control rate | Odds ratio                     |
|--------------------------|------------|--------------|--------------------------------|
| Athens, Greece           | 25.0%      | 62.1%        | 0.20 [0.07, 0.59]              |
| Dundee, Scotland         | 32.6%      | 62.1%        | 0.30 [0.15, 0.60]              |
| Galway, Ireland          | 20.0%      | 62.1%        | 0.15 [0.03, 0.75]              |
| Leuven, Belgium          | 64.0%      | 62.1%        | 1.08 [0.45, 2.64]              |
| Monza, Italy             | 25.9%      | 62.1%        | 0.21 [0.08, 0.54]              |
| Newcastle, Eng           | 37.5%      | 62.1%        | 0.37 [0.08, 1.60]              |
| Vojvodina, Serbia        | 33.3%      | 62.1%        | 0.30 [0.07, 1.27]              |
| London, UK (Ellis et al) | 33.3%      | 62.1%        | 0.30 [0.05, 1.73]              |
| Pooled                   | $I^2=27\%$ |              | 0.33 [0.23, 0.47],<br>p<0.0001 |

Table S5: Mortality meta-analysis data

Table S5(a): Relative risk of mortality during follow-up. Pooled data are obtained from random effects meta-analysis.

| <b>Cohort</b>                                          | <b>Scores</b> | <b>RR – mild</b> | <b>RR – moderate</b> | <b>RR severe</b>   |
|--------------------------------------------------------|---------------|------------------|----------------------|--------------------|
| <b>Dundee,<br/>Scotland (n=494)</b>                    | <b>BSI</b>    | 0.12 (0.02-0.90) | 1.00 (reference)     | 3.09 (1.66-5.77)   |
|                                                        | <b>FACED</b>  | 0.38 (0.18-0.80) | 1.00 (reference)     | 3.15 (1.67-5.94)   |
| <b>Galway,<br/>Ireland (n=280)</b>                     | <b>BSI</b>    | 0.61 (0.26-1.46) | 1.00 (reference)     | 2.65 (1.39-5.03)   |
|                                                        | <b>FACED</b>  | 0.30 (0.17-0.50) | 1.00 (reference)     | 0.56 (0.15-2.03)   |
| <b>Monza,<br/>Italy (n=250)</b>                        | <b>BSI</b>    | 0.22 (0.01-4.20) | 1.00 (reference)     | 4.83 (1.39-16.72)  |
|                                                        | <b>FACED</b>  | 0.49 (0.11-2.13) | 1.00 (reference)     | 5.70 (1.81-18.0)   |
| <b>Leuven,<br/>Belgium (n=190)</b>                     | <b>BSI</b>    | 0.15 (0.04-0.64) | 1.00 (reference)     | 1.35 (0.80-2.28)   |
|                                                        | <b>FACED</b>  | 0.31 (0.15-0.64) | 1.00 (reference)     | 2.19 (1.36-3.54)   |
| <b>Athens,<br/>Greece (n=159)</b>                      | <b>BSI</b>    | Not estimable    | 1.00 (reference)     | 10.32 (0.62-173.2) |
|                                                        | <b>FACED</b>  | 0.04 (0.00-0.69) | 1.00 (reference)     | 2.19 (0.66-7.22)   |
| <b>Newcastle,<br/>England (n=126)</b>                  | <b>BSI</b>    | 0.39 (0.02-9.19) | 1.00 (reference)     | 4.69 (0.65-33.7)   |
|                                                        | <b>FACED</b>  | 0.25 (0.09-0.69) | 1.00 (reference)     | 1.45 (0.48-4.34)   |
| <b>Vojvodina,<br/>Serbia (n=113)</b>                   | <b>BSI</b>    | 0.05 (0.00-0.76) | 1.00 (reference)     | 1.33 (0.63-2.82)   |
|                                                        | <b>FACED</b>  | 0.23 (0.08-0.65) | 1.00 (reference)     | 1.13 (0.40-3.16)   |
| <b>London, England (N=76)<br/>Ellis et al ERJ 2016</b> | <b>BSI</b>    | 0.25 (0.11-0.60) | 1.00 (reference)     | 2.29 (1.49-3.52)   |
|                                                        | <b>FACED</b>  | 0.30 (0.22-0.41) | 1.00 (reference)     | 2.03 (1.30-3.18)   |

Table S5(b): Relative risk of mortality during follow-up. Pooled data are obtained from random effects meta-analysis.

| <b>Cohort</b>                                          | <b>Scores</b> | <b>RR – mild</b>  | <b>RR – moderate</b> | <b>RR severe</b>   |
|--------------------------------------------------------|---------------|-------------------|----------------------|--------------------|
| <b>Dundee,<br/>Scotland (n=494)</b>                    | <b>BSI</b>    | 0.12 (0.02-0.90)  | 1.00 (reference)     | 3.09 (1.66-5.77)   |
|                                                        | <b>FACED</b>  | 0.38 (0.18-0.80)  | 1.00 (reference)     | 3.15 (1.67-5.94)   |
| <b>Galway,<br/>Ireland (n=280)</b>                     | <b>BSI</b>    | 0.61 (0.26-1.46)  | 1.00 (reference)     | 2.65 (1.39-5.03)   |
|                                                        | <b>FACED</b>  | 0.30 (0.17-0.50)  | 1.00 (reference)     | 0.56 (0.15-2.03)   |
| <b>Monza,<br/>Italy (n=250)</b>                        | <b>BSI</b>    | 0.22 (0.01-4.20)  | 1.00 (reference)     | 4.83 (1.39-16.72)  |
|                                                        | <b>FACED</b>  | 0.49 (0.11-2.13)  | 1.00 (reference)     | 5.70 (1.81-18.0)   |
| <b>Leuven,<br/>Belgium (n=190)</b>                     | <b>BSI</b>    | 0.15 (0.04-0.64)  | 1.00 (reference)     | 1.35 (0.80-2.28)   |
|                                                        | <b>FACED</b>  | 0.31 (0.15-0.64)  | 1.00 (reference)     | 2.19 (1.36-3.54)   |
| <b>Athens,<br/>Greece (n=159)</b>                      | <b>BSI</b>    | Not estimable     | 1.00 (reference)     | 10.32 (0.62-173.2) |
|                                                        | <b>FACED</b>  | 0.04 (0.00-0.69)  | 1.00 (reference)     | 2.19 (0.66-7.22)   |
| <b>Newcastle,<br/>England (n=126)</b>                  | <b>BSI</b>    | 0.39 (0.02-9.19)  | 1.00 (reference)     | 4.69 (0.65-33.7)   |
|                                                        | <b>FACED</b>  | 0.25 (0.09-0.69)  | 1.00 (reference)     | 1.45 (0.48-4.34)   |
| <b>Vojvodina,<br/>Serbia (n=113)</b>                   | <b>BSI</b>    | 0.05 (0.00-0.76)  | 1.00 (reference)     | 1.33 (0.63-2.82)   |
|                                                        | <b>FACED</b>  | 0.23 (0.08-0.65)  | 1.00 (reference)     | 1.13 (0.40-3.16)   |
| <b>London, England (N=76)<br/>Ellis et al ERJ 2016</b> | <b>BSI</b>    | 0.55 (0.02-12.86) | 1.00 (reference)     | 6.96 (0.87-55.6)   |
|                                                        | <b>FACED</b>  | 0.39 (0.06-2.56)  | 1.00 (reference)     | 3.17 (0.56-17.9)   |
| <b>Pooled cohort</b>                                   | <b>BSI</b>    | 0.29 (0.14-0.61)  | 1.00 (reference)     | 2.39 (1.56-3.66)   |
|                                                        | <b>FACED</b>  | 0.30 (0.22-0.41)  | 1.00 (reference)     | 2.10 (1.39-3.16)   |

Figure S1

Health related quality of life using the St. Georges Respiratory Questionnaire (SGRQ) total score across BSI and FACED groups.

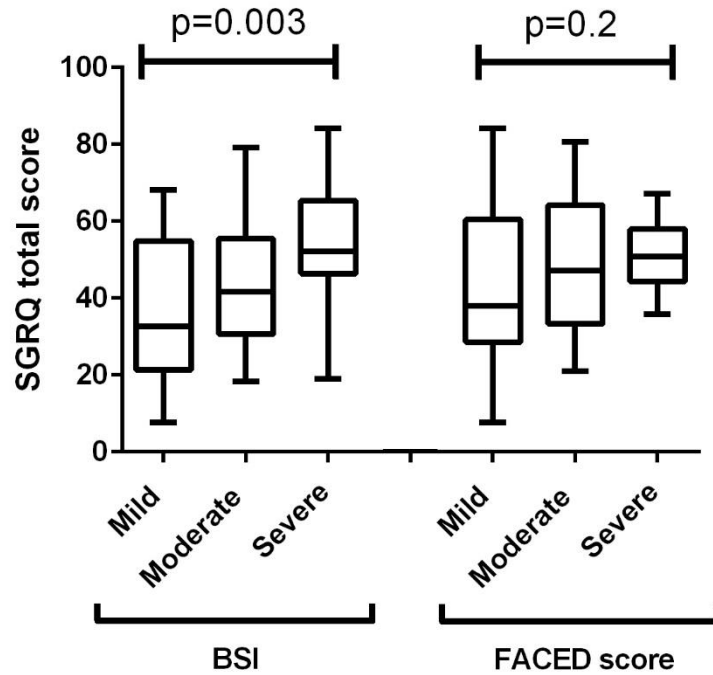

The figure shows a significant difference across BSI groups, with differences of 9 and 11 points comparing mild/moderate and moderate/severe respectively. In contrast there were no statistically significant differences between FACED groups, and the between group difference for moderate/severe was below the minimum clinically important difference of 4 units.
